# Supplementary material for: Direct recovery of scrapped LiFePO4 by a green and low-cost electrochemical re-lithiation method
Source: Royal Society of Chemistry journal article supplement (doi:10.1039/d2gc01640k), 2022-01-01
Supplement: d2gc01640k1.pdf [file d2gc01640k1.pdf]

Electronic Supplementary Information (ESI)

## Direct Recovery of Scraped LiFePO<sub>4</sub> by a Green and Low-Cost

### Electrochemical Re-lithiation Method

Shiyu Zhou,<sup>a</sup> Jingzhen Du,<sup>a</sup> Xiaosong Xiong,<sup>a</sup> Lili Liu,<sup>a</sup> Jing Wang,<sup>\*a</sup> Lijun Fu,<sup>a</sup> Jilei Ye,<sup>\*a</sup> Yuhui Chen,<sup>a</sup> and Yuping Wu<sup>\*a,b</sup>

<sup>a</sup>. State Key Laboratory of Materials-oriented Chemical Engineering & School of Energy Science and Engineering, Nanjing Tech University, Nanjing, 211816, China. E-mail: wjx2015@njtech.edu.cn (Wang), yejilei@njtech.edu.cn (Ye), and wuyp@njtech.edu.cn (Wu)

<sup>b</sup>. School of Energy and Environment, South East University, Nanjing, 211189, China. E-mail: wuyp@njtech.edu.cn

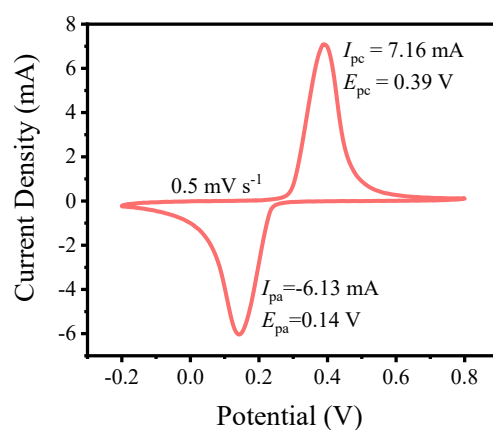

**Fig. S1** CV curve of S-LFP in lithium sulfate aqueous solution.

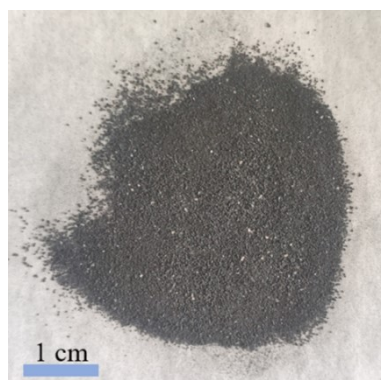

**Fig. S2** S-LFP cathode powder stemming from retired LFP battery.

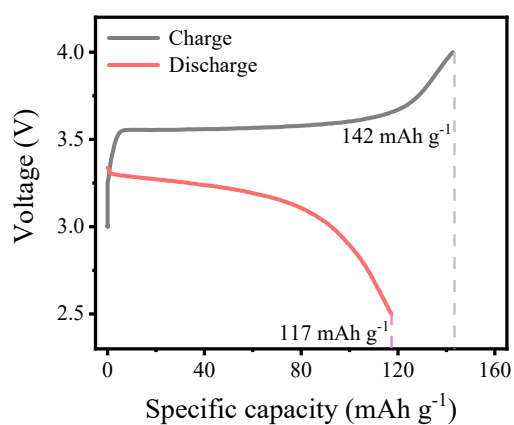

**Fig. S3** The first charge/discharge profiles of S-LFP at 1 C (1 C = 170 mAh g<sup>-1</sup>).

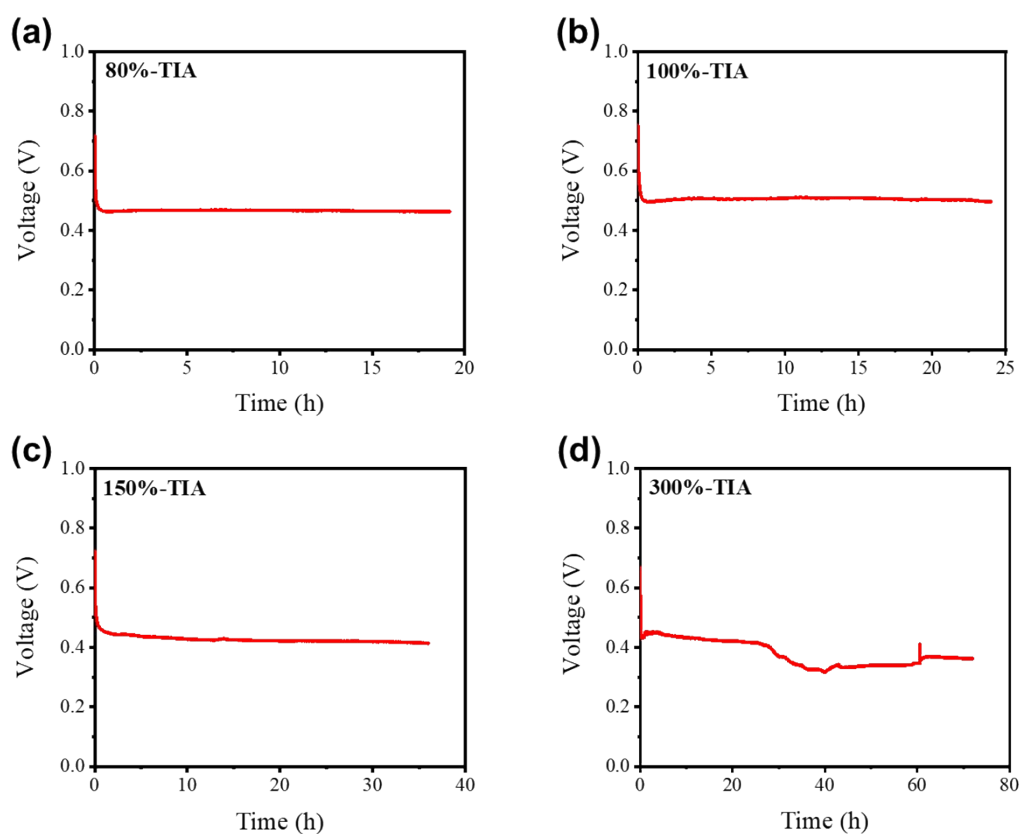

**Fig. S4** The Discharge curves of re-lithiation process at different TIA. (a) 80%-TIA, (b) 100%-TIA, (c) 150%-TIA, and (d) 300%-TIA.

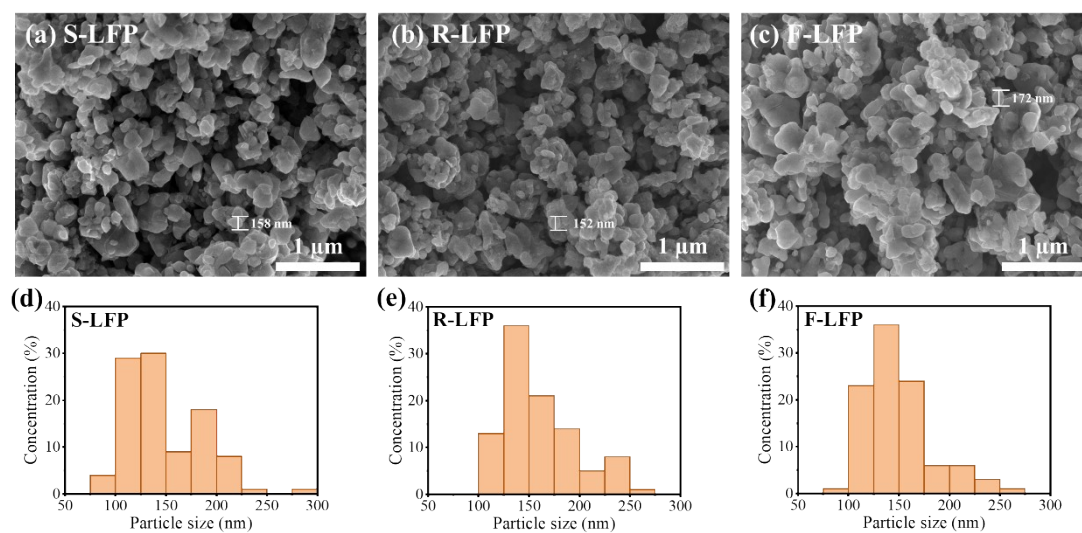

**Fig. S5** SEM images and particle size distributions of different LFP samples. (a) and (d) S-LFP, (b) and (e) R-LFP, (c) and (f) F-LFP.

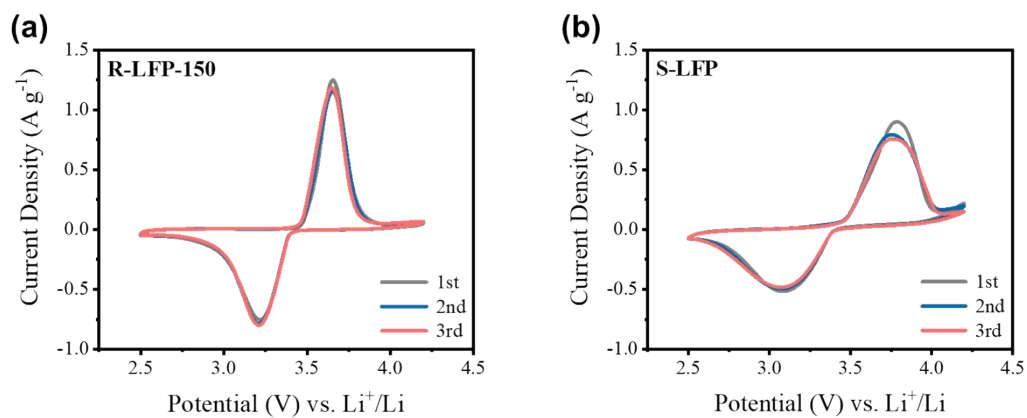

**Fig. S6** CV curves of the first three cycles. (a) R-LFP-150, and (b) S-LFP with a scan rate of  $0.5 \text{ mV s}^{-1}$  in the potential range of 2.5-4.2 V (vs.  $\text{Li}^+/\text{Li}$ ).

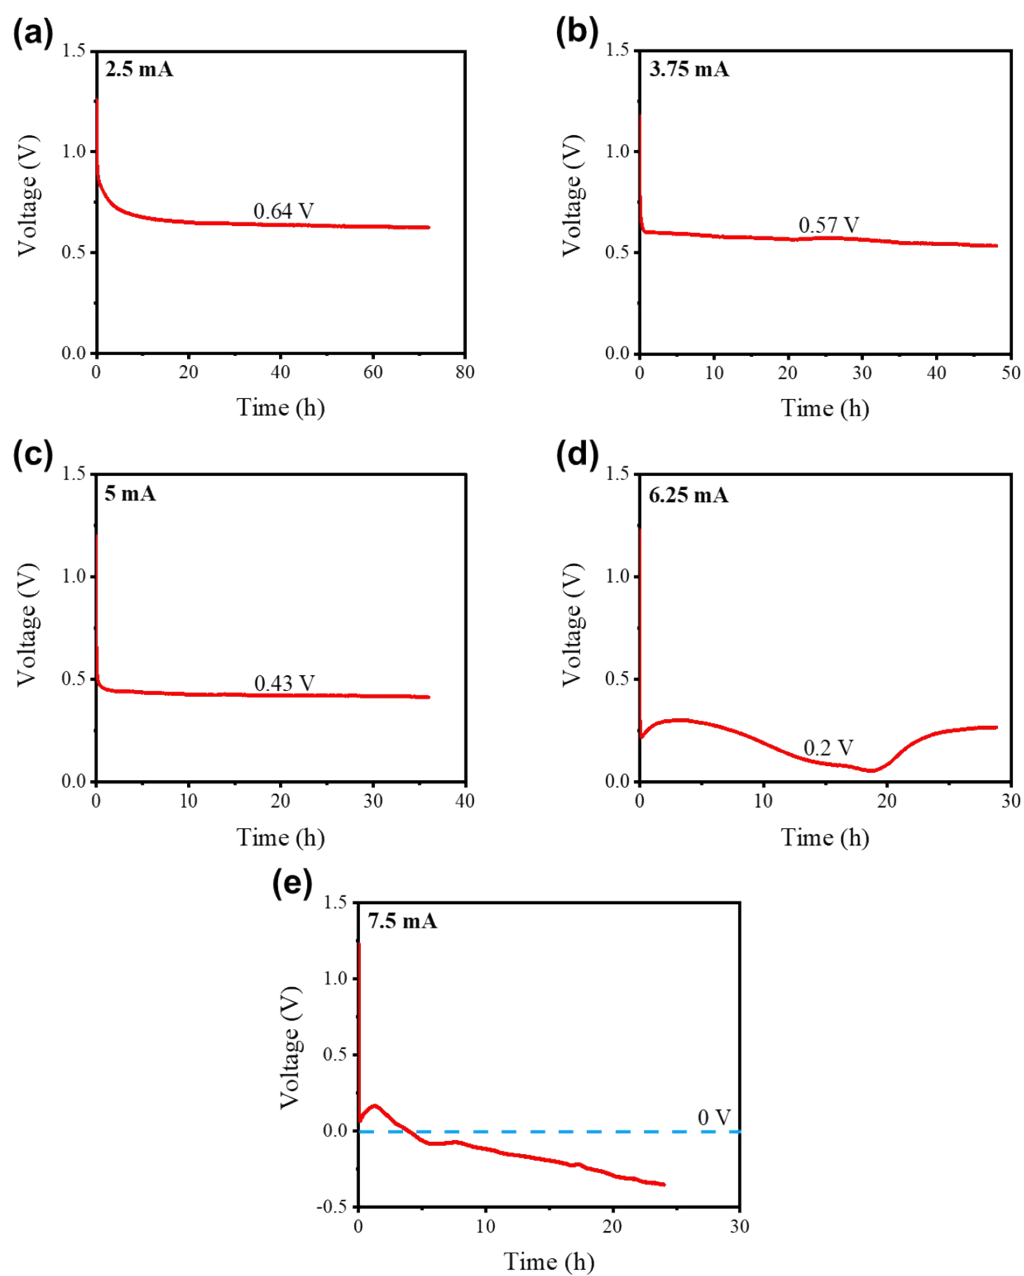

**Fig. S7 The Discharge curves of re-lithiation process at different current.** (a) 2.5 mA, (b) 3.75 mA, (c) 5 mA, (d) 6.25 mA, and (e) 7.5 mA.

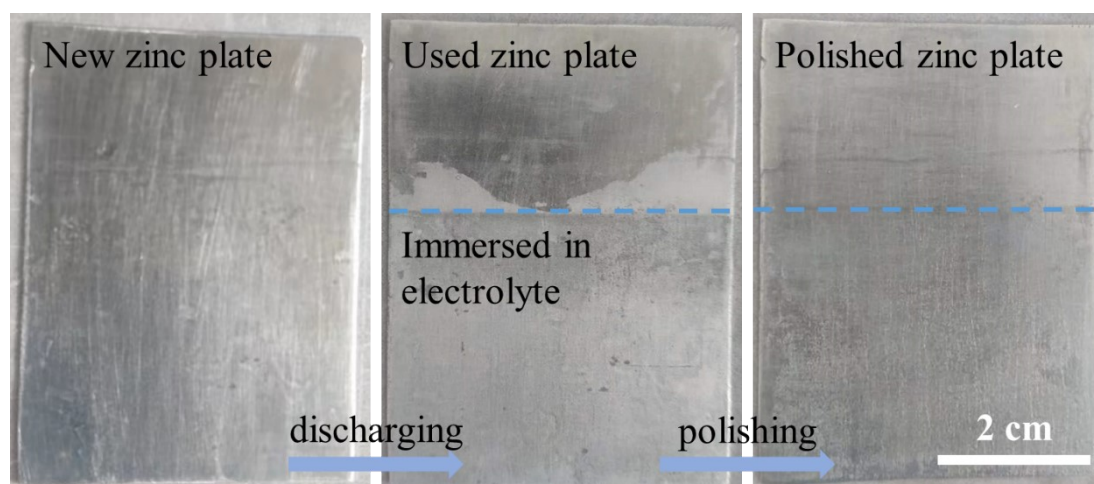

**Fig. S8** Zinc plate anode at different states.

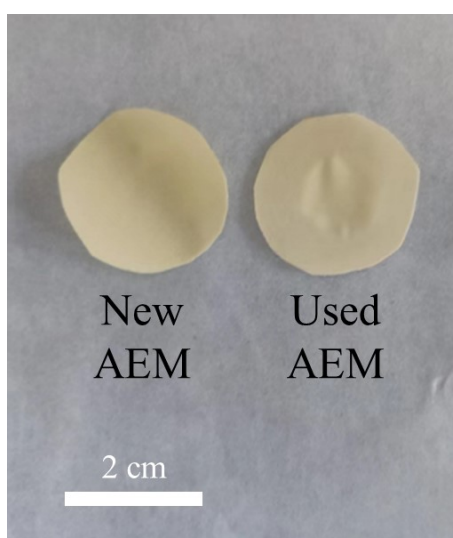

**Fig. S9** The anion-exchange membrane (AEM) at different states.

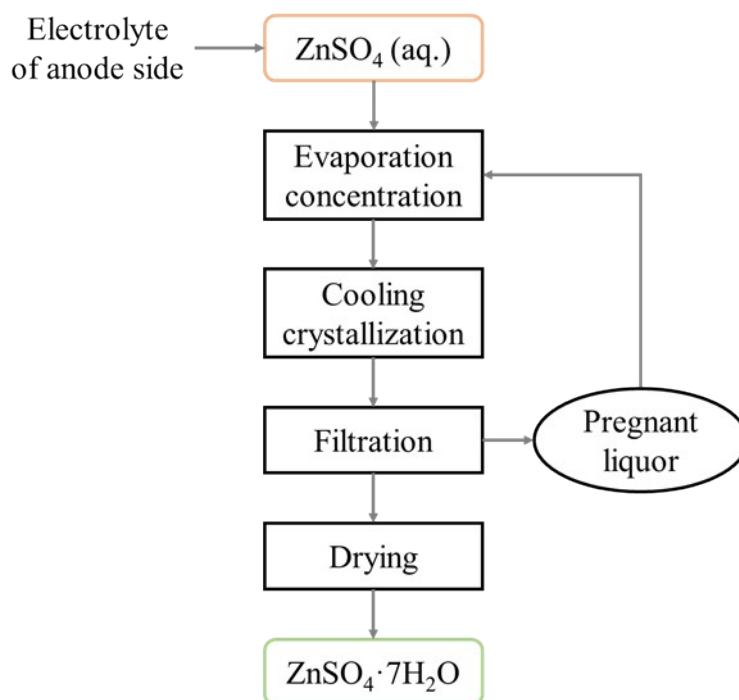

**Fig. S10** The flow chart of recycling  $\text{ZnSO}_4$  in anode electrolyte.

**Table S1.** Lithium element content in S-LFP and R-LFP recycled at different TIA.

| LFP samples            | S-LFP | 80%  | 100% | 150% | 300% |
|------------------------|-------|------|------|------|------|
| Lithium content (wt.%) | 3.38  | 3.64 | 3.67 | 3.81 | 3.68 |

**Table S2.** Lithium element content in S-LFP and R-LFP recycled at different current.

| LFP samples            | S-LFP | 2.5 mA | 3.75 mA | 5 mA | 6.25 mA |
|------------------------|-------|--------|---------|------|---------|
| Lithium content (wt.%) | 3.38  | 3.46   | 3.53    | 3.81 | 3.95    |

**Table S3.** The Warburg factor ( $\sigma$ ) and lithium ion diffusion coefficient ( $D_{Li^+}$ ) of S-LFP and R-LFP recycled at different TIA.

| LFP samples | $\sigma / \Omega$ | $D_{Li^+} / \text{cm}^2 \text{ s}^{-1}$ |
|-------------|-------------------|-----------------------------------------|
| S-LFP       | 233               | $1.23 \times 10^{-16}$                  |
| 80%         | 107               | $5.81 \times 10^{-16}$                  |
| 100%        | 100               | $6.65 \times 10^{-16}$                  |
| 150%        | 64                | $1.62 \times 10^{-15}$                  |
| 300%        | 128               | $4.06 \times 10^{-16}$                  |

**Table S4.** The Warburg factor ( $\sigma$ ) and lithium ion diffusion coefficient ( $D_{Li^+}$ ) of S-LFP and R-LFP recycled at different current.

| LFP samples | $\sigma / \Omega$ | $D_{Li^+} / \text{cm}^2 \text{ s}^{-1}$ |
|-------------|-------------------|-----------------------------------------|
| S-LFP       | 233               | $1.23 \times 10^{-16}$                  |
| 2.5 mA      | 160               | $2.60 \times 10^{-16}$                  |
| 3.75 mA     | 112               | $5.30 \times 10^{-16}$                  |
| 5 mA        | 64                | $1.62 \times 10^{-15}$                  |
| 6.25 mA     | 76                | $1.15 \times 10^{-15}$                  |

**Table S5.** The initial coulombic efficiency (ICE) of S-LFP and R-LFP recycled at different TIA.

| LFP samples | S-LFP | 80%   | 100%  | 150%  | 300%  |
|-------------|-------|-------|-------|-------|-------|
| ICE         | 82.2% | 97.7% | 92.6% | 94.6% | 99.7% |

**Table S6.** The ICE of S-LFP and R-LFP recycled at different current.

| LFP samples | S-LFP | 2.5 mA | 3.75 mA | 5 mA  | 6.25 mA |
|-------------|-------|--------|---------|-------|---------|
| ICE         | 82.2% | 92.7%  | 92.6%   | 94.6% | 95.3%   |

**Table S7.** The cost to recycle 1 ton of S-LFP cathode material.

|                                                   | Unit price                | Dosage     | Cost (\$)   |
|---------------------------------------------------|---------------------------|------------|-------------|
| S-LFP                                             | 1406 \$/t <sup>1</sup>    | 1 t        | 1406        |
| Li <sub>2</sub> SO <sub>4</sub> ·H <sub>2</sub> O | 2270 \$/t <sup>2</sup>    | 0.1533 t   | 347.0       |
| electric energy                                   | 0.08 \$/kW·h <sup>3</sup> | 20.25 kW·h | 1.62        |
| Total cost                                        |                           |            | <b>1755</b> |

**Table S8.** The relevant data about the recent development in the direct recycling methods of LFP.

| Raw materials                               | Treatment methods and conditions                                                                                     | Electrochemical performance of R-LFP                                                              | Ref.     |
|---------------------------------------------|----------------------------------------------------------------------------------------------------------------------|---------------------------------------------------------------------------------------------------|----------|
| Spent $\text{LiFePO}_4$ (S-LFP)             | Heat-treatment at $650^\circ\text{C}$ for 1 h, $\text{Ar}/\text{H}_2$                                                | $135.0 \text{ mAh g}^{-1}$ at 1 C                                                                 | 4        |
| S-LFP and Fresh LFP                         | Heat-treatment at $700^\circ\text{C}$ for 8 h, $\text{N}_2$                                                          | $144.0 \text{ mAh g}^{-1}$ at 0.1 C, 97.0% after 100 cycles                                       | 5        |
| S-LFP and $\text{Li}_2\text{CO}_3$          | Heat-treatment at $650^\circ\text{C}$ for 1 h, $\text{Ar}/\text{H}_2$                                                | $147.3 \text{ mAh g}^{-1}$ at 0.2 C, 95.3% after 100 cycles                                       | 6        |
| S-LFP and Li/Fe/P source                    | Heat-treatment at $650^\circ\text{C}$ for 10 h, $\text{N}_2$                                                         | $139.0 \text{ mAh g}^{-1}$ at 0.2 C, 95.0% after 100 cycles                                       | 7        |
| S-LFP, LiOH and graphene oxide              | Hydrothermal at $160^\circ\text{C}$ for 6h                                                                           | $150.4 \text{ mAh g}^{-1}$ at 0.5 C, almost 100% after 300 cycles                                 | 8        |
| S-LFP and $\text{Li}_2\text{SO}_4$          | Hydrothermal at $200^\circ\text{C}$ for 3h                                                                           | $141.9 \text{ mAh g}^{-1}$ at 1 C, 98.6% after 200 cycles                                         | 9        |
| S-LFP, LiOH and $\text{Li}_2\text{CO}_3$    | Hydrothermal at $180^\circ\text{C}$ for 5h and annealing with $\text{Li}_2\text{CO}_3$ at $600^\circ\text{C}$ for 2h | $159.0 \text{ mAh g}^{-1}$ at 0.5 C and $144.0 \text{ mAh g}^{-1}$ at 2 C, 93.7% after 300 cycles | 10       |
| S-LFP and $\text{Li}_2\text{C}_2\text{O}_4$ | In situ electrochemical process by pre-lithiation separator                                                          | $138.0 \text{ mAh g}^{-1}$ at 1 C, 83.5% after 150 cycles                                         | 11       |
| S-LFP and $\text{Li}_2\text{SO}_4$          | Electrochemical relithiation by discharging the electrolytic tank                                                    | $134.0 \text{ mAh g}^{-1}$ at 1 C, 85.5% after 300 cycles                                         | Our work |

**Table S9.** The lithium content in the cathode and anode electrolyte after discharging.

| Electrolyte at different state                                                                     | lithium concentration<br>(mol L <sup>-1</sup> ) |
|----------------------------------------------------------------------------------------------------|-------------------------------------------------|
| Cathode electrolyte before discharging<br>(1 mol L <sup>-1</sup> Li <sub>2</sub> SO <sub>4</sub> ) | 2                                               |
| Anode electrolyte before discharging<br>(0.1 mol L <sup>-1</sup> ZnSO <sub>4</sub> )               | 0                                               |
| Cathode electrolyte after discharging                                                              | 1.880                                           |
| Anode electrolyte after discharging                                                                | 0.03588                                         |

**Calculation of current efficiency based on the change of the Li<sup>+</sup> concentration:**

The Li<sup>+</sup> concentration of cathode and anode electrolyte respectively after discharging at the best condition are presented in the **Table S9**. Obviously, the lithium concentration decreases to 1.880 mol L<sup>-1</sup> after discharging, the loss of lithium can be divided into two parts, one is intercalated into S-LFP to achieve relithiation, the other migrates to the anode electrolyte, which cannot be recycled due to far low concentration (0.03588 mol L<sup>-1</sup>), but this part will affect the utilization efficiency of lithium. In addition, the theoretical consumption of lithium element when recycling 1 mol S-LFP is 0.264 mol, so the theoretical consumption of lithium element when recycling 4 g S-LFP in this experiment is 0.0067 mol. Therefore, the current efficiency ( $\eta$ ) based on the change of the Li<sup>+</sup> concentration can be calculated as follows:

$$\eta = \frac{0.0067}{(2 - 1.88) * 80 * 10^{-3}} * 100\% = 70\%$$

where 0.0067 mol is the theoretical consumption of lithium, (2 mol L<sup>-1</sup>-1.88 mol L<sup>-1</sup>) \* 80 mL \* 10<sup>-3</sup> is the practical consumption of lithium in the recycling process.

**Calculation of costs:**

- (1) **The cost of raw materials.** The cost of S-LFP cathode material pre-treated in the industry is 1406 \$/t.
- (2) **The cost of reagent.** According to the unit price and dosage of the reagent listed in **Table S7**, the cost of reagent for the optimal recycling parameters (150%-TIA and 5 mA of discharge current) is calculated as follows:

1-theoretical consumption of lithium element when recycling 1 mol S-LFP:

$$30 \text{ mAh g}^{-1} * 150\% / 170 \text{ mAh g}^{-1} = 0.2647 \text{ mol}$$

2-practical consumption of lithium element when recycling 1 mol S-LFP:

$$0.2647 \text{ mol} / 70\% = 0.3781 \text{ mol}$$

3- practical consumption of  $\text{Li}_2\text{SO}_4 \cdot \text{H}_2\text{O}$  when recycling 1-ton S-LFP:

$$(0.3781 \text{ mol} * 127.96 \text{ g mol}^{-1}) / (2 * 157.76 \text{ g mol}^{-1}) = 0.1533 \text{ t}$$

4-cost of  $\text{Li}_2\text{SO}_4 \cdot \text{H}_2\text{O}$  when recycling 1-ton S-LFP:

$$0.1533 \text{ t} * 2270 \text{ \$/t} = 347.0 \text{ \$}$$

(3) **The cost of electric energy.** According to **Table S7**, the cost of electric energy for the optimal recycling parameters (150%-TIA and 5 mA of discharge current) is calculated as follows:

1-consumption of electric energy when recycling 4 g S-LFP with stable voltage of 0.45 V:

$$30 \text{ mAh g}^{-1} * 150\% * 4 \text{ g} * 0.45 \text{ V} = 8.100 * 10^{-5} \text{ kW} \cdot \text{h}$$

2-cost of electric energy when recycling 1-ton S-LFP:

$$8.1 * 10^{-5} \text{ kW} \cdot \text{h} * 1,000,000 \text{ g} / 4 \text{ g} * 0.08 \text{ \$/kW} \cdot \text{h} = 1.620 \text{ \$}$$

It can be seen that the electric energy consumption is so low as to can be negligible.

**The total cost of recycling 1-ton S-LFP cathode material:**

$$1406 \text{ \$} + 347.0 \text{ \$} + 1.620 \text{ \$} \approx 1755 \text{ \$}$$

### Calculation of benefits and profits:

When S-LFP is recycled by the proposed electrochemical re-lithiation method, almost all the S-LFP can be recovered due to the continuous magnetic stirring process at cathode of H-type electrolytic tank, so the recovery efficiency can be regarded as 100%, which means that 1-ton R-LFP with best electrochemical performance can be obtained when recycling 1-ton S-LFP. Because the average price of LFP used for energy storage is 7283.29  $\text{\$/t}$ ,<sup>12</sup> so the corresponding benefits and profits are calculated as follows:

**(1) Benefits.**

$$7283.29 \text{ \$}/\text{t} * 1 \text{ t} \approx 7283 \text{ \$}$$

**(2) Profits:**

$$7283 \text{ \$} - 1755 \text{ \$} = 5528 \text{ \$}$$

**References**

1. H. Jin, J. Zhang, D. Wang, Q. Jing, Y. Chen and C. Wang, *Green Chem.*, 2022, **24**, 152-162.
2. <https://detail.1688.com/offer/599410878440.html?spm=a261b.2187593.0.0.64273fc3mASq6D>
3. [http://www.js.sgcc.cn/html/main/col2816/2021-10/07/20211007172756061726347\\_1.html](http://www.js.sgcc.cn/html/main/col2816/2021-10/07/20211007172756061726347_1.html)
4. J. Chen, Q. Li, J. Song, D. Song, L. Zhang and X. Shi, *Green Chem.*, 2016, **18**, 2500.
5. X. Song, T. Hu, C. Liang, H. L. Long, L. Zhou, W. Song, L. You, Z. S. Wu and J. W. Liu, *RSC Adv.*, 2017, **7**, 4783.
6. X. Li, J. Zhang, D. Song, J. Song and L. Zhang, *J. Power Sources*, 2017, **345**, 78-84.
7. Q. Liang, H. Yue, S. Wang, S. Yang, K. Lam and X. Hou, *Electrochim. Acta*, 2020, **330**, 135323.
8. W. Song, J. Liu, L. You, S. Wang, Q. Zhou, Y. Gao, R. Yin, W. Xu and Z. Guo, *J. Power Sources*, 2019, **419**, 192-202.
9. L. Zhang, Z. Xu and Z. He, *ACS Sustainable Chem. Eng.*, 2020, **8**, 11596-11605.
10. P. Xu, Q. Dai, H. Gao, H. Liu, M. Zhang, M. Li, Y. Chen, K. An, Y. S. Meng, P. Liu, Y. Li, J. S. Spangenberg, L. Gaines, J. Lu and Z. Chen, *Joule*, 2020, **4**, 2609-2626.
11. M. Fan, Q. Meng, X. Chang, C. F. Gu, X. H. Meng, Y. X. Yin, H. Li, L. J. Wan and Y. G. Guo, *Adv. Energy Mater.*, 2022, **12**, 2103630.
12. Y. Song, B. Xie, S. Song, S. Lei, W. Sun, R. Xu and Y. Yang, *Green Chem.*, 2021, **23**, 3963-3971.
